# Supplementary material for: Simulated microgravity attenuates myogenic differentiation via epigenetic regulations
Source: PubMed Central journal article supplement (PMC5966377; doi:10.1038/s41526-018-0045-0), 2018-05-23
Supplement: 41526_2018_45_MOESM1_ESM.pdf [file 41526_2018_45_MOESM1_ESM.pdf]

# Supplementary Figures

## Figure S1

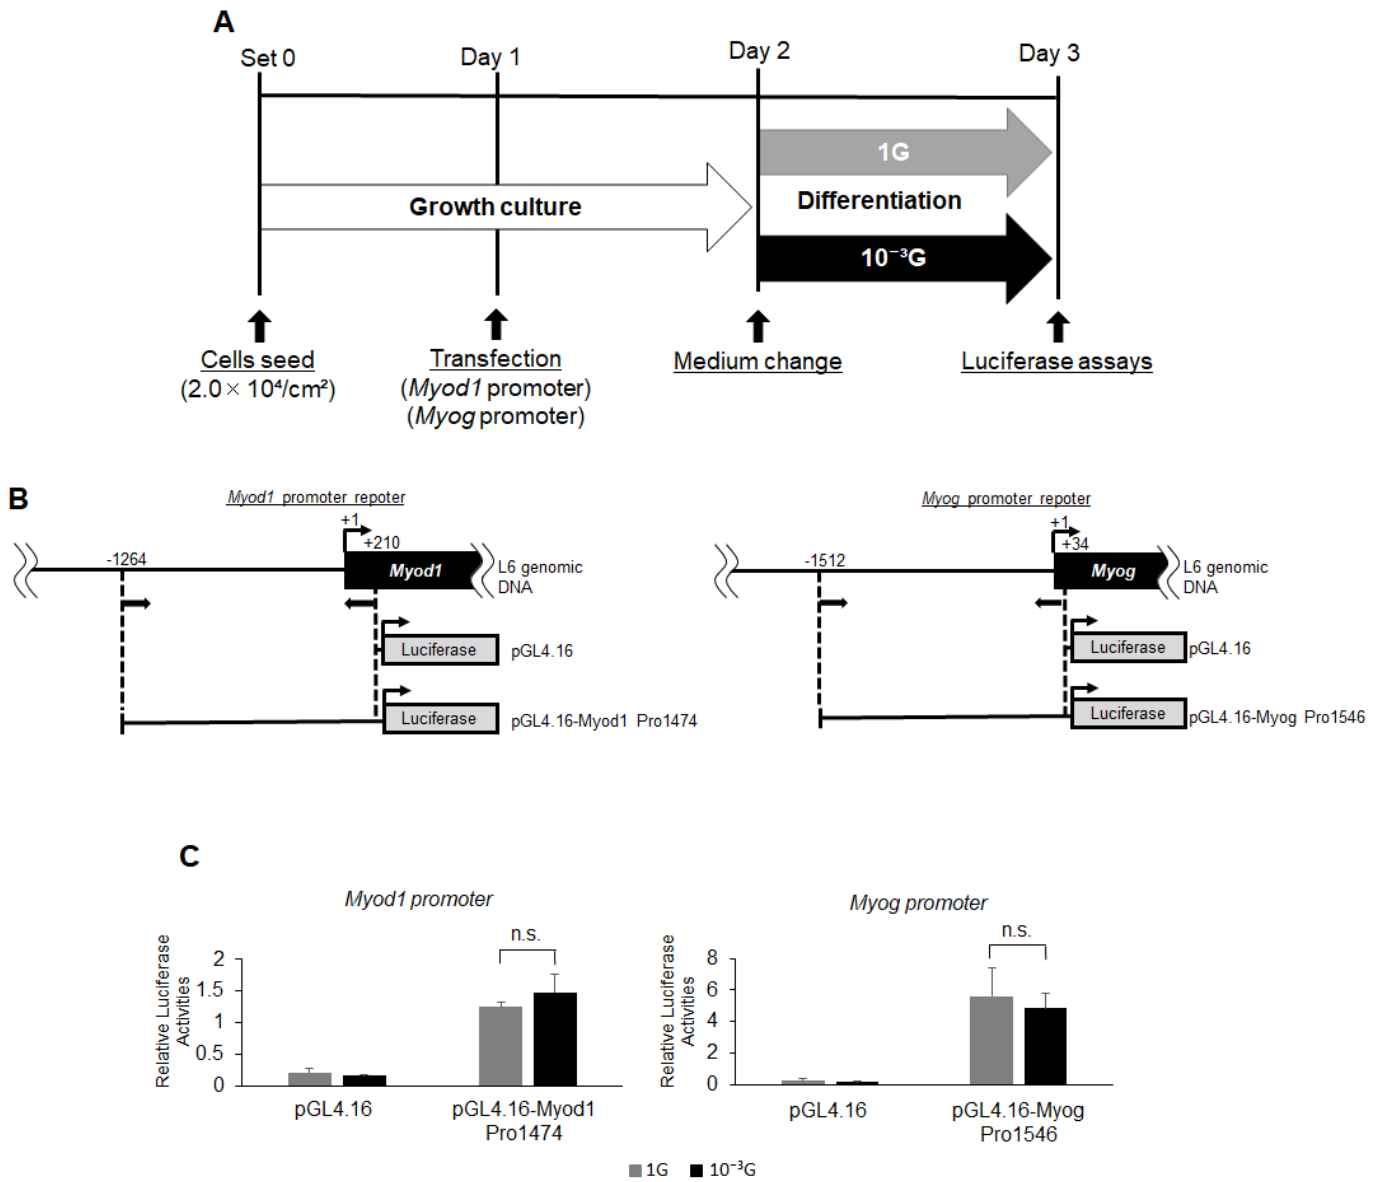



## Supplementary Tables

### S1 Table. Primer and probe sets for real-time RT-PCR

*Myod1* Forward: 5'-CCCTGTTGTTTGTGGAGACA-3'

Reverse: 5'-CTGTGGGAAAGAGTGGGTGT-3'

Universal Probe Library: #50

*Myog* Forward: 5'-CTACAGGCCTTGCTCAGCTC-3'

Reverse: 5'-TGGAGTTGCATTCAGTGG-3'

Universal Probe Library: #63

*Myf6* Forward: 5'-GGGCCTGGTGATAACTGCT-3'

Reverse: 5'-AGAAAGGCGCTGAAGACTG-3'

Universal Probe Library: #12

*Des* Forward: 5'-GCCTTGGATGTGGAGATTG-3'

Reverse: 5'-TGGATCGGAAGGTTGATCC-3'

Universal Probe Library: #120

*Ckm* Forward: 5'-CTGCCCTGATGTATCAAACG-3'

Reverse: 5'-GAACTTGTTGTGGGTGTTGC-3'

Universal Probe Library: #20

*Myf5* Forward: 5'-ACAGCAAAGACAGACACTCAGG-3'

Reverse: 5'-TGTGTCCTGAAGAGCCAACTC-3'

Universal Probe Library: #21

*Mef2c* Forward: 5'-GGCTTCAATACTGCCAGTGC-3'

Reverse: 5'-TGAGATAAATGAGTGCTAGTGCAA-3'

Universal Probe Library: #74

*Pax3* Forward: 5'-TTACTGAGGCCCGAGTGC-3'

Reverse: 5'-CATCAGTTGATTGGCTCCAG-3'

Universal Probe Library: #69

*Pax7* Forward: 5'-ACCACTACCCGGACATCTA-3'

Reverse: 5'-CACGACGGTTACTGAACCAG-3'

Universal Probe Library: #17

*Dnmt1* Forward: 5'-AACGGTGTTGTCTACCGACTG-3'

Reverse: 5'-GCTGGCCATTTTGATGTTG -3'

Universal Probe Library: #16

*Dnmt3a* Forward: 5'-AACTGAGACCCCACCAGAAG-3'

Reverse: 5'-TGGTCTGCTTCTGTTCTTTGC-3'

Universal Probe Library: #66

*Dnmt3b* Forward: 5'-GATGCCAGGACTCCCTCTG-3'

Reverse: 5'-TTCTGGGGGAGGTTCTTTG-3'

Universal Probe Library: #64

*Mbd2* Forward: 5'-TCAGCGGATGAATGAACAAC-3'

Reverse: 5'-TCTGATGCGCTAAGTCCTTG-3'

Universal Probe Library: #7

*Tdg* Forward: 5'-GCTCCGAACATGGCAGAC-3'

Reverse: 5'-CCTTCTCTTTGGAGCCTCTG-3'

Universal Probe Library: #56

*Actb* Forward: 5'-CCCGCGAGTACAACCTCCT-3'

Reverse: 5'-CGTCATCCATGGCGAACT-3'

Universal Probe Library: #17

## **S2 Table. Primer sets for real-time PCR**

*Myod1* promoter region Forward: 5'-AGACTTGGGCAGGCTGCACC-3'

Reverse: 5'-TAGCTTAGAGCCAGGCGCCC-3'

### **S3 Table. Primer sets for promoter cloning**

*Myod1* promoter Forward: 5'-GGTACCTCCCCAGTGAACCTGCTG-3'

Reverse: 5'-GTCCCAGTTCTGGGTCCTGC-3'

*Myog* promoter Forward: 5'-GGTACCTGTTTCCTCCTTCAAAGACAG-3'

Reverse: 5'-CAGGTCGGAAAAGACTTGTTTC-3'

## Supplementary Information

**S1 Fig. Promoter activities of *Myod1* and *Myog* genes under microgravity conditions.** (A) Schematic representation of experimental time course is shown. L6 cells were transfected with *Myod1* or *Myog* promoter reporters (designated pGL4.16-Myod1 Pro1474 or pGL4.16-Myog Pro1546) and incubated for 1 day. Growth medium was then replaced with differentiation medium and incubated for one more day under 1G or  $10^{-3}$ G conditions. (B) Schematic structures of promoter regions and luciferase reporters of *Myod1* and *Myog* genes. (C) Relative luciferase reporter activities were analyzed using dual-luciferase assays and then calculated as the ratio of firefly to renilla luciferase readings. Columns show the mean of three independent experiments; bars, SD. (n = 3)



**S2 Fig. mRNA stabilities of *Myod1* and *Myog* genes under**

**microgravity conditions.** (A) Schematic representation of experimental time

course is shown. L6 cells were cultured for 2 days in growth medium. Medium was then

replaced with differentiation medium and incubated for one more day. After adding 5

µg/ml of actinomycin D, cells were cultured under 1G or 10<sup>-3</sup>G conditions for 0, 15, 30

45, 60 or 120 min. (B) Expression levels of *Myod1*, *Myog*, and *Actb* genes were evaluated

by real-time RT-PCR. Three independent measurements were averaged and relative gene

expression levels were calculated as the ratio against *Actb* expression for each experiment.

Columns show the mean of three independent experiments; bars, SD. (n = 3)
